der Aufstellung verschiedener Gesetzmäßigkeiten gekommen. Zunächst ist festzustellen, dass es eine sehr deutliche Korrelation gibt zwischen dem Sauerstoffverbrauch und der Ökologie der Art. Tiere, die frei auf dem Boden leben, haben einen wesentlich höheren Sauerstoffverbrauch als solche, die sich im Schlamm vergraben. Dass hierbei die Beweglichkeit von Ausschlag ist, zeigt sich daran, dass die Auster, die zwar im freien Wasser lebt, aber festgewachsen ist, einen Sauerstoffverbrauch zeigt, der etwa mit dem der Schlammbewohner übereinstimmt. Auf der anderen Seite sind die sehr beweglichen Pectiniden und Limiden durch einen Sauerstoffverbrauch ausgezeichnet, der in derselben Größenordnung liegt, wie derjenige gewisser pelagischer Fische, der Krebse und der Austernlarven.

Der Verfasser findet ferner eine sehr bemerkenswerte Abhängigkeit des Sauerstoffverbrauchs von der geographischen Verbreitung, und zwar ergibt sich hierbei, dass die arktischen Arten im Verhältnis zu den Mittelmeerarten einen recht hohen Sauerstoffverbrauch besitzen. Auf diese Dinge hat der Verfasser bereits in früheren Veröffentlichungen aufmerksam gemacht. Es sei dies näher für die Gattung *Pecten* ausgeführt. Der arktische *Pecten groenlandicus*, der bei einer Wassertemperatur von wenig über  $0^{\circ}$  lebt, verbraucht bei  $+1^{\circ}$  25 c.c. p. kg. u. St., schon bei wenigen Grad über  $0^{\circ}$  steigt der Verbrauch auf 50—60 c.c. Der boreal-mediterrane *Pecten varius* verbraucht dagegen bei  $5^{\circ}$  nur 25 c.c. Der mediterrane *Pecten flexuosus* begnügt sich bei der gleichen Temperatur mit einem Sauerstoffverbrauch von nur 10 c.c.

Ähnliches lässt sich für viele andere Arten beweisen. So hat der dänische *Mytilus edulis* einen deutlich höheren Stoffwechsel als die Mittelmeerrassen der gleichen Art, die grönländischen *Astarte*-Arten haben einen höheren Sauerstoffverbrauch als die aus den dänischen Gewässern.

Wie der Verfasser hervorhebt, scheint es sich hier um eine geographische Rassenbildung zu handeln im Sinne von Runnström. Es ist offenbar so, dass Tiere, deren Stoffwechsel durch niedere Temperaturen sehr herabgedrückt werden würde, in den arktischen Gewässern nicht gedeihen, wachsen und sich fortpflanzen könnten, wenn sie nicht einen sehr energischen Stoffwechsel hätten. Auf der anderen Seite ergibt es sich, dass die arktischen Arten bei höheren Temperaturen zugrunde gehen, *Pecten groenlandicus* z. B. bereits bei einer Temperatur von  $8-10^{\circ}$ . Der Verfasser betont daher, dass die sogenannten stenothermischen Tiere als solche betrachtet werden müssen, die einen arktischen Stoffwechsel haben.

Erwähnt sei, dass derartige Abhängigkeiten seit längerer Zeit auch für das Blut der marinen Fische bekannt sind, das bei arktischen Tieren ganz andere Eigenschaften besitzt als bei südlichen. Die Arbeit von Spärck ist daher eine wichtige Bestätigung und Erweiterung dieser älteren Befunde und ein wertvoller Beitrag zur Kenntnis des Stoffwechsels mariner Tiere.

v. Buddenbrock.

**H. Thamdrup.** "Beiträge zur Ökologie der Wattenfauna auf experimenteller Grundlage." Medd. Komm. Danmarks Fisk.- og Havunders. Ser. Fisk. Bd. X, Nr. 2. København, 1935.

This paper deals principally with an investigation carried out on the intertidal fauna inhabiting a typical area on the east coast of the Skalling peninsula, which lies to the south-east of Blaavands Huk. Supplementary investigations were made on other parts of the North Sea coasts. The paper is much more than a mere account of the local fauna. While the distribution of the local species is naturally fully dealt with, the reactions and relationships of the different animals to their environment have been

investigated in varying detail, and a considerable amount of correlated experimental work undertaken. The paper is the best account which we have at present of a piece of shore ecology in all its aspects, as may be gathered from the titles of the principal sections into which the paper is divided: — physical-chemical factors; general biology of the dominant species; distribution of the various year-groups; rate of growth of *Macoma* and *Cardium*; distribution of the various species on the shore, etc. There is, in addition, a very full bibliography of papers dealing with the subject, to which constant reference is made. There are also twenty-six clear and interesting plates at the end of the paper which give a very good idea of the type of ground on which the work was done, and of the detailed appearance of the habitats of the principal species.

With regard to the physical-chemical factors some ten were analysed, and of these, period of submergence, texture and water-content of the substratum, temperature and food-supply were found to be the determining factors.

The investigations at Skalling were carried out along two lines on the shore, each about five hundred metres in length, extending from H. W. M. to L. W. M. The fauna was that usually associated with the *Cardium-Macoma* zone divisible into two sub-zones, an upper one marked by *Hydrobia-Pygospio-Corophium*, and a lower one marked by *Arenicola-Cardium-Macoma*. In parts the population was very dense, although the number of species is naturally rather limited. As many as 3,000 to 4,000 individuals, having a weight of 3.4 kg., were taken on a square metre.

A series of curves is given showing the numbers of each species per m.<sup>2</sup> and their weight, at different seasons. These give a clear idea of the seasonal variations in density and distribution.

*Arenicola* was found most abundantly where the sand was mixed with a little mud; *Scoloplos* where there was pure sand. *Corophium* cannot live on the same ground as *Cardium*, since the latter breaks up its tubes. *Macoma* was found to be most abundant in the lower reaches of the beach, since it is there that its food is most abundant.

At the higher stations the numbers of individuals were much greater than at the lower stations (as 16:1), but the total weight was in the reverse order (as 1:30). The consumption of oxygen was also greater at the lower stations (as 1:7).

Altogether this is a most interesting and useful paper and the author is to be congratulated on it. We look forward to further contributions on the same subject, more especially on certain important problems which have just been touched on in the present paper, and on which further work is promised.

A. C. S.

**E. Fischer-Piette.** "Études sur la biogéographie intercotidale des deux rives de la Manche." Journ. Linn. Soc. London, Zool., Vol. XL, pp. 181—272. London, 1936.

For a number of years Dr. Fischer-Piette has studied the distribution of the common species of animals and algae in the littoral zone on the two sides of the Channel, and he has now brought together the results of his investigations in the form of charts of the variation of abundance of the different species from place to place. While emphasizing the necessity of more prolonged study of each individual locality before a positive statement can be made of the absence from it of any given species, he
